# Supplementary material for: Effect of magnesium particle fraction on osteoinduction of hydroxyapatite sphere-based scaffolds
Source: Royal Society of Chemistry journal article supplement (doi:10.1039/c9tb01162e), 2019-01-01
Supplement: c9tb01162e1.pdf [file c9tb01162e1.pdf]

## Supplementary Information

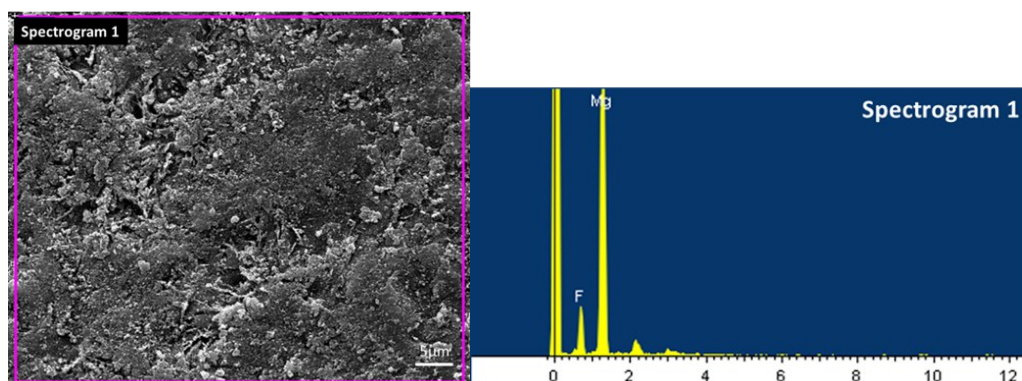

| Element      | Weight percentage | Atomic percentage |
|--------------|-------------------|-------------------|
| F            | 21.38             | 25.81             |
| Mg           | 78.62             | 74.19             |
| Total amount | 100               | 100               |

**Fig. S1** The EDS spectrum of HF-treated Mg particles, and F was detected.

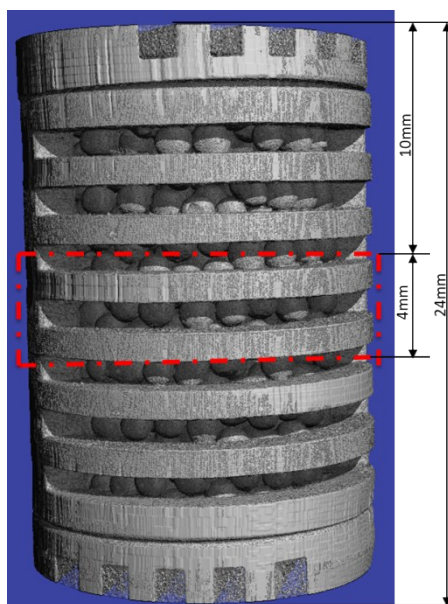

**Fig. S2** Schematic illustration of the middle portion of the scaffold (as framed in red), where the images in Fig 6 and 8 were taken from.
